## CORRECTIONS

Inverse regulation of F<sub>1</sub>-ATPase activity by a mutation at the regulatory region on the  $\gamma$  subunit of chloroplast ATP synthase

H. KONNO, M. YODOGAWA, M. T. STUMPP, P. KROTH, H. STROTMANN, K. MOTOHASHI, T. AMANO and T. HISABORI

Volume 352 (2000), pp. 783–788

There were two errors in the legend for Figure 4 of the above paper: “20  $\mu$ M CuCl<sub>2</sub> (filled bars)” should read “20  $\mu$ M CuCl<sub>2</sub> (open bars)” and “1 mM DTT plus 2  $\mu$ M Trx-*m* (open bars)” should read “1 mM DTT plus 2  $\mu$ M Trx-*m* (filled bars)”.

## Detection of phospholipid oxidation in oxidatively stressed cells by reversed-phase HPLC coupled with positive-ionization electrospray MS

C. M. SPICKETT, N. RENNIE, H. WINTER, L. ZAMBONIN, L. LANDI, A. JERLICH, R. J. SCHAUR and A. R. PITT

Volume 355 (2001), pp. 449–457

The correct title of this paper is as shown above. In the title of the original paper, “electrospray” had mistakenly been replaced by “electroscopy”.

Chimaeras reveal the role of the catalytic core in the activation of the plasma membrane Ca<sup>2+</sup> pump

W. BA-THEIN, A. J. CARIDE, Á. ENYEDI, K. PÁSZTY, C. L. CROY, A. G. FILOTEO and J. T. PENNISTON

Volume 356 (2001), pp. 241–245

Figure 1 was distorted and is shown correctly below (the online journal was not affected):

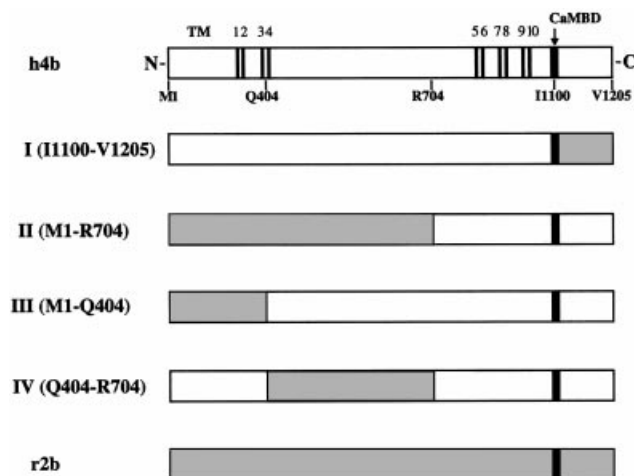

**Figure 1** Chimaeras used in the present study

The 10 transmembrane (TM) regions are indicated by the thin vertical lines, which are numbered to identify them. ‘CaMBD’ refers to the calmodulin-binding domain (which does not pass through the membrane). Substitution of regions of isoform 2b for the corresponding regions of isoform 4b is indicated by grey shading of the region. Note that chimaera II (Met-1–Arg-704) contains both cytoplasmic loops, while chimaera III (Met-1–Gln-404) contains the small cytoplasmic domain, and chimaera IV (Gln-404–Arg-704) contains the large cytoplasmic domain. The prefixes h and r denote human and rat respectively.

## **Triacylglycerol-rich lipoproteins alter the secretion, and the cholesterol-effluxing function, of apolipoprotein E-containing lipoprotein particles from human (THP-1) macrophages**

E. M. LINDHOLM, A. M. PALMER and A. GRAHAM

Volume 356 (2001), pp. 515–523

There were two errors in the reference list of the above paper: in reference 35a “Ridell” should read “Riddell” and in reference 48 the last author Owen, J. S. is missing.
